# Supplementary material for: Clinical characteristics of the severe acute respiratory syndrome coronavirus 2 omicron variant compared with the delta variant: a retrospective case-control study of 318 outpatients from a single sight institute in Japan
Source: PeerJ. 2022 Aug 2;10:e13762. doi: 10.7717/peerj.13762 (PMC9354737; doi:10.7717/peerj.13762)
Supplement: Table S3 [file peerj-10-13762-s003.xlsx]

## Sheet: Sheet1
deltaphase0 omicron 1	age	male=1 female=0	pneumoniae	Oxygen requirement yes=1 no=0	death	oxygen way cannulas＝０ oxygen masks＝１ Nasal high flow=２	history	hyperlipidemia	hypertention	renal failure	athsma	heart failure	COPD	liver disease	malginancy	lung disease	hematologic disease	Autoimmunue disease	Diabetes	neuroligic disease	vaccine (times)	vaccine yes=1	smoking yes=1	WBC	seg	ｌｙｍ	seg/lym	CRP	AST	ALT	LDH	Ferritin	D-dimer	Plt	dexamethazon	Nirmatrelvir+Ritonavir	molnupiravir	casirivimab/imdevimab	remdesivir	varicitinib	Sotorovimab	admission	BMI
0	78	0	1	1	1	2	1	1	0	0	0	0	0	0	0	0	0	0	1	0	0	0	1	9530	81.4	12.5	6.512	2.93	152	118	212	604	1.1	177	1	0	0	0	1	0	0	1	30.5
1	71	1	1	1	0	0	1	0	0	0	0	0	0	0	1	0	0	0	1	0	2	1	0	12850	82.8	9.3	8.90323	11.05	17	13	158	145.6	1.1	184	0	0	0	0	1	0	0	1	27.6
1	82	1	1	1	0	0	1	0	0	0	0	0	0	0	0	1	0	0	0	1	2	1		9560	88.4	6	14.7333	26.21	31	13	229	84.1	3.2	126	0	0	0	0	1	0	0	1
1	44	1	1	0	0		0	1	0	0	0	0	0	0	0	0	0	0	0	0	2	1	1	3360	63.4	25.9	2.44788	0.26	35	72	266	608.3	1.1	99	0	0	0	0	1	0	0	1	27.5
1	46	0	1	0	0		0	0	0	0	0	0	0	0	0	0	0	0	0	0	2	1	0	6340	68	19.6	3.46939	2.6	25	45	172	185.3	0.4	275	0	0	0	0	1	0	0	0	29.2
1	43	1	1	0	0		1	0	0	0	0	0	0	0	0	0	0	0	1	0	2	1	1	4040	59.2	34.2	1.73099	2.53	27	21	218	588.1	0.4	109	0	0	0	0	1	0	0	1	31.7
1	70	1	1	1	0	1	1	0	1	0	0	1	0	0	0	0	0	0	0	1	2	1	0	3160	61.7	28.8	2.14236	6.32	25	26	195	489.6	0.4	123	0	0	0	0	0	0	0	1
1	85	0	1	1	0	1	1	0	0	0	0	0	0	0	0	0	0	0	0	1	2	1	0	5180	78.6	12.7	6.18898	1.35	16	4	173	80.1	8.6	114	1	0	0	0	1	0	0	1	25
1	85	1	1	1	0	1	1	0	1	0	0	1	0	0	0	0	0	0	0	1	2	1	0	6540	67.9	23.7	2.86498	2.17	23	17	194	803.2	1.9	135	1	0	0	0	1	0	0	1
1	83	1	1	0	0		1	0	1	0	0	0	0	0	0	0	0	0	0	0	3	1	0	7700	63.1	25.5	2.47451	6.47	39	35	81	227.5	1.5	168	0	0	0	0	1	0	0	1	30.1
1	67	1	1	0	0		0	0	0	0	0	0	0	0	0	0	0	0	0	0	2	1	1	5870	42.3	45.1	0.937916	8.72	54	36	429	2446.7	0.7	107	1	0	1	0	1	0	0	1	26.9
1	97	0	1	1	0	0	1	0	1	0	0	0	0	0	0	0	0	0	0	0	2	1		8131	84.7	9.1	9.30769	12.76	16	9	153	212.3	3.1	216	0	0	0	0	0	0	1	1	18
1	86	1	1	1	0	0	1	0	1	0	1	1	0	0	0	0	0	0	0	0	2	1		2860	64.4	21.7	2.96774	6.37	70	36	409	79.8	1.8	147	1	0	0	0	1	0	0	1	23.1
1	85	1	1	0	0		1	0	1	0	0	1	0	0	0	0	0	0	0	0	3	1		5060	56.5	34.6	1.63295	0.13	22	15	210	277.7	1.1	213	0	0	0	0	0	0	0	0	24.2
1	65	1	1	1	0	1	1	0	0	0	0	0	1	0	0	0	0	0	1	0	2	1		12510	67.5	24.7	2.73279	5.63	75	64	192	63.9	10.5	271	0	1	0	0	0	0	0	1	18.1
1	74	1	1	0	0		1	0	0	0	0	0	0	0	0	0	0	0	1	0	2	1	1	2600	71	20	3.55	1.75	28	23	270	212.5	1.2	84	0	0	0	0	0	0	1	0	25.1
1	95	1	1	1	0	0	1	0	1	0	0	0	0	1	0	0	0	0	0	1	2	1	0	3980	71	20.9	3.39713	2.92	29	10	199	569.6	1.1	105	0	0	0	0	0	0	0	1
1	84	1	1	1	0	0	1	0	1	0	0	0	0	0	1	0	0	0	0	0	2	1	0	3100	56.9	30.6	1.85948	14.86	69	35	213	392.5	0.6	130	1	0	0	0	1	0	0	1	26.4
1	77	1	1	0	0		1	1	1	0	0	0	0	0	0	0	0	0	0	0	2	1	0	3070	57.3	32.9	1.74164	0.8	34	25	231	266.4	0.2	218	0	0	0	0	1	0	0	1	32.8
1	70	1	1	1	0	1	1	0	1	1	0	0	0	0	0	0	0	0	1	0	2	1		7550	86.3	10.3	8.37864	0.06	50	33	236	126	6.2	235	1	0	0	0	0	0	1	1	21.7
1	78	0	1	0	0		1	0	1	0	0	1	0	0	0	0	0	0	0	0	2	1	0	6330	70.3	18.6	3.77957	2.35	33	14	306	232.6	2.1	199	1	0	0	0	1	0	0	1	28.2
1	72	1	1	0	0		1	0	1	0	0	0	0	0	0	0	0	0	0	1	2	1	0	6920	86.5	7.2	12.0139	12.32	112	161	252	1634	1.4	274	1	0	0	0	0	0	0	0
1	56	1	1	0	0		1	0	1	0	0	0	0	0	0	0	0	0	1	0	2	1	1	9130	78	12	6.5	5.94	19	17	211	650	0.5	183	1	0	0	0	1	0	0	1	32.8
1	68	1	1	1	0	0	0	1	0	0	0	0	0	0	0	0	0	0	0	0	2	1	0	3980	72	7	10.2857	2.22	74	92	260	1058.6	1.5	97	1	0	0	0	1	0	0	1	24
1	84	0	1	0	0		0	1	0	0	0	0	0	0	0	0	0	0	0	0	2	1	0	2450	46	39	1.17949	0.74	34	17	199	161.5	0.6	139	0	0	0	0	1	0	0	1
1	64	1	1	0	0		1	1	0	0	0	0	0	0	0	0	0	0	1	0	2	1	1	5650	72.6	16.6	4.37349	2.91	40	44	224			163	0	0	0	0	0	0	1	0	26.8
1	60	1	1	0	0		1	0	1	0	0	0	0	0	0	0	0	0	1	0	2	1	0	6030	66.9	18.7	3.57754	8.02	27	38	216	526.8	0.5	215	0	0	0	0	0	0	0	1	37.1
1	68	1	1	1	0	1	1	0	0	0	0	0	1	0	0	0	0	0	0	0	2	1	1	5470	77.1	13	5.93077	3.58	45	60	226	416.5	0.4	169	1	0	0	0	1	0	0	1	26.4
1	51	0	1	0	0		1	0	0	0	1	0	0	0	0	0	0	0	0	0	2	1	0	6350	57.6	22	2.61818	0.79	30	26	219	193.9	0.3	245	1	0	0	0	0	0	0	0
1	73	1	1	1	0	1	1	0	0	0	0	1	1	0	0	0	0	0	0	1	2	1	1	3190	45.8	33.2	1.37952	0.53	28	25	221	216.2	4.6	136	1	0	0	0	1	0	0	1	23
1	90	0	1	1	0	0	1	0	0	0	0	0	0	0	1	0	0	1	0	0	2	1	0	7440	83	7	11.8571	4.32	16	6	203	100.3	0.9	238	0	0	1	0	0	0	0	1	20.7
1	87	1	1	1	0	0	1	0	0	0	0	1	0	0	0	0	0	0	0	1	2	1		3940	74.4	18.5	4.02162	0.84	52	27	213	274	3.7	166	0	0	0	1	0	0	0	1
1	49	1	1	0	0		0	0	0	0	0	0	0	0	0	0	0	0	0	0	1	1	1	4030	72	20.1	3.58209	6.4	31	35	266	267.2	0.6	233	0	0	0	1	0	0	0	1	23
1	50	1	1	0	0		0	0	0	0	0	0	0	0	0	0	0	0	0	0	0	0	1	3930	48.3	35.1	1.37607	3.45	23	24	220	434.8	1.1	170	0	0	0	0	1	0	0	1	23.1
1	46	1	1	0	0		0	0	0	0	0	0	0	0	0	0	0	0	0	0	0	0	1	3140	68.8	23.9	2.87866	3.33	24	25	245	495.2	0.2	134	0	0	0	0	1	0	0	0	22.5
1	57	1	1	0	0		0	0	0	0	0	0	0	0	0	0	0	0	0	0	0	0	1	3380	59	27	2.18519	0.8	44	47	250	812.1	0.5	97	0	0	0	0	1	0	0	1	25.22
1	81	0	1	0	0		1	0	0	0	0	0	0	0	1	0	0	0	0	0	0	0		3600	30	55	0.545455	0.64	23	16	190	184.4	1.9	148	0	0	0	0	0	0	0	0	23.5
1	86	0	1	0	0		1	0	0	0	0	0	0	0	0	0	0	0	0	1	0	0		3480	65	26.1	2.49042	0.33	21	7	203	46.6	0.5	280	0	0	0	0	1	0	0	1	17.3
1	87	0	1	0	0		1	0	1	0	0	0	0	0	1	0	0	0	0	0	0	0	0	6530	69.2	21.6	3.2037	2.34	32	19	315	338.5	0.5	197	0	1	0	0	0	0	0	0	20.8
1	66	1	1	0	0		1	1	1	0	0	0	1	0	0	0	0	0	0	0	0	0	1	5590	62	29.9	2.07358	5.63	24	30	246	372.4	0.7	184	0	0	0	0	0	0	1	0
1	41	0	1	0	0		0	0	0	0	0	0	0	0	0	0	0	0	0	0	0	0	0	3860	67.8	24.9	2.72289	3.36	16	9	211	55.7	0.1	135	0	0	0	0	1	0	0	1	23.2
1	38	1	1	0	0		0	0	0	0	0	0	0	0	0	0	0	0	0	0	0	0	1	5260	54.6	35.7	1.52941	1.5	32	31	327	685.1	0.6	198	1	0	0	0	0	0	0	0	29.4
1	62	1	1	0	0		1	0	1	0	0	0	0	0	0	0	0	0	0	0	0	0	1	2900	69	24.5	2.81633	0.29	31	24	241	613.7	0.5	108	0	0	0	0	0	0	1	0	25.4
1	84	1	1	0	0		1	0	0	0	0	0	0	0	0	0	0	0	0	1				8100	72.4	18.4	3.93478	4.95	20	9	151	199.2	1.1	264	0	0	1	0	0	0	0	1
1	73	0	1	0	0		1	0	0	0	0	0	0	0	0	0	0	0	1	0	0			3620	59.6	27.1	2.19926	6.98	34	24	299	443.2	1.2	153	1	0	0	0	1	0	0	1	27.8
1	79	0	1	1	0	0	1	1	1	0	0	0	0	0	0	0	0	0	0	0				5550	80.1	15.7	5.10191	14.48	34	17	288	41.4	0.5	149	1	0	0	0	1	0	0	1	27.1
1	46	1	1	0	0		0	0	0	0	0	0	0	0	0	0	0	0	0	0	0		1	7070	67.9	19.8	3.42929	3.94	31	30	429	858.8	0.3	319	0	0	0	0	1	0	0	1	27.8
1	41	1	1	0	0		1	0	0	0	0	1	0	0	0	0	0	0	1	0	0			4780	61.3	28.5	2.15088	5.56	34	57	239	701.6	0.1	147	0	0	0	0	0	0	0	1	29.2
1	73	0	1	1	0	0	1	0	1	0	0	1	0	0	0	1	0	0	1	0			0	6770	79.4	13.9	5.71223	0.8	16	9	181	15.1	0.1	182	0	0	0	1	0	0	0	1	22.3
0	70	1	1	0	0		1	0	0	0	0	0	0	0	0	1	0	0	0	0	2	1	0	6740	81.1	11.3	7.17699	5.95	27	29	213	256.9	0.2	174	1	0	0	1	1	0	0	1	23.4
0	74	1	1	0	0		0	0	0	0	0	0	0	0	0	0	0	0	0	0	2	1		4130	63.4	28.1	2.25623	1.78	32	28	248	316.6	0	167	1	0	0	0	0	0	0	0	18.6
0	44	1	1	0	0		0	0	0	0	0	0	0	0	0	0	0	0	0	0	1	1	0	5060	67.8	26.1	2.5977	3.69	22	18	238	234.3	0.5	119	1	0	0	0	0	0	0	0	22.5
0	44	1	1	0	0		0	0	0	0	0	0	0	0	0	0	0	0	0	0	1	1	0	5060	62	17.8	3.48315	3.11	47	34	238	234.3	0.5	119	1	0	0	0	0	0	0	0	22.5
0	49	0	1	1	0	0	1	0	0	0	0	0	0	0	0	1	0	0	0	0	1	1	0	5460	82.2	14.7	5.59184	3.72	62	60	294	167.5	0.6	172	1	0	0	0	1	0	0	1	26.26
0	74	1	1	1	0	0	1	0	0	0	0	0	1	0	0	0	0	0	1	0	2	1	1	3760	73.6	16.8	4.38095	3.23	31	19	290	159.5	21.5	57	1	0	0	0	1	0	0	1
0	37	0	1	0	0		0	0	0	0	0	0	0	0	0	0	0	0	0	0	0	0	0	2660	74.4	21.1	3.52607	0.43	20	13	213	28.3	0.3	199	1	0	0	0	1	1	0	1	22.8
0	17	1	1	0	0		1	0	0	0	1	0	0	0	0	0	0	0	0	0	0	0	0	4330	69.3	22.4	3.09375	2.04	50	21	453	246.8	0.4	128	1	0	0	0	1	0	0	1	19
0	58	0	1	0	0		0	0	0	0	0	0	0	0	0	0	0	0	0	0	0	0	0	3370	65.3	26.4	2.47348	0.54	31	22	195	112	2.6	160	0	0	0	1	0	0	0	0	25.6
0	33	1	1	0	0		0	0	0	0	0	0	0	0	0	0	0	0	0	0	0	0	0	3070	69	27.4	2.51825	5.07	50	56	349	1150.3	1.9	200	0	0	0	1	0	0	0	0	34.3
0	45	0	1	0	0		0	0	0	0	0	0	0	0	0	0	0	0	0	0	0	0	0	3720	84.6	12.4	6.82258	3.67	22	13	288	313.8	0.7	120	1	0	0	0	1	1	0	1	19.4
0	39	0	1	0	0		0	0	0	0	0	0	0	0	0	0	0	0	0	0	0	0	0	3710	58	34.5	1.68116	5.64	83	117	332	984.1	0.2	113	1	0	0	0	1	0	0	1	25.73
0	53	0	1	1	0	0	1	0	0	0	0	0	1	0	1	1	0	0	0	0	0	0	1	4010	75.4	16.2	4.65432	1.79	47	38	280	102.1	0.3	114	1	0	0	0	1	0	0	1	21.42
0	34	1	1	0	0		0	0	0	0	0	0	0	0	0	0	0	0	0	0	0	0	0	3590	67.7	24	2.82083	1.08	22	17	75	200.5	0.2	136	1	0	0	0	0	0	0	0	18.9
0	34	1	1	0	0		0	0	0	0	0	0	0	0	0	0	0	0	0	0	0	0	0	2870	59.3	27.2	2.18015	0.11	16	15	159	298.6	0	187	0	0	0	0	0	0	0	1	21.25
0	57	1	1	0	0		1	0	1	0	0	0	0	0	0	0	0	0	0	0	0	0	1	4510	78	16	4.875	3.23	34	20	302	915.3	1.2	89	0	0	0	1	0	0	0	1	23.92
0	48	1	1	0	0		0	0	0	0	0	0	0	0	0	0	0	0	0	0	0	0	1	4630	55.6	28.9	1.92388	3.25	49	58	277	568.2	0.6	171	1	0	0	0	1	0	0	1	19.86
0	44	0	1	1	0	0	1	0	0	0	0	0	0	0	0	0	1	0	0	0	0	0	0	4340	82	13	6.30769	2.15	22	14	180	37.3	0.5	29	1	0	0	0	1	0	0	1	27.17
0	49	1	1	0	0		0	0	0	0	0	0	0	0	0	0	0	0	0	0	0	0	1	6450	62.9	26.5	2.37358	3.2	25	24	246	387.9	0.5	178	1	0	0	0	1	0	0	1	31.48
0	44	0	1	0	0		1	0	0	0	0	1	0	0	0	0	0	0	0	0	0	0	1	3100	64.6	27.1	2.38376	5.53	29	19	197	36.3	0	132	0	0	0	1	0	0	0	0	19.22
0	46	1	1	0	0		1	0	0	0	0	0	0	0	0	0	0	0	1	0	0	0	1	4280	70.8	18.5	3.82703	2.49	15	18	107	280.3	0.4	107	1	0	0	0	0	0	0	0	21.24
0	43	1	1	0	0		0	0	0	0	0	0	0	0	0	0	0	0	0	0	0	0	0	4110	65.5	37.2	1.76075	2.11	44	43	442	608	0.5	111	1	0	0	0	1	0	0	1	25.02
0	67	0	1	1	0	0	1	1	1	0	0	0	0	0	0	0	0	0	0	0	0	0	0	4150	56.9	37.8	1.50529	6.65	49	38	268	304.4	1.4	150	1	0	0	0	1	0	0	1	25.19
0	51	1	1	0	0		1	0	1	0	0	0	0	0	0	0	0	0	0	0	0	0	1	3500	63.1	22.3	2.8296	1.3	34	45	208	362.4	0.3	110	1	0	0	1	0	0	0	0	25.4
0	44	1	1	1	0	2	0	0	0	0	0	0	0	0	0	0	0	0	0	0	0	0	0	5610	82.5	11.8	6.99153	7.5	112	95	881	2572.2	1.1	136	1	0	0	0	1	1	0	1	25.41
0	42	1	1	0	0		0	0	0	0	0	0	0	0	0	0	0	0	0	0	0	0	1	4500	66.5	21.3	3.12207	11.03	95	105	324	495	0.3	117	1	0	0	0	1	0	0	1	24
0	41	0	1	0	0		1	0	0	0	1	0	0	0	0	0	0	0	0	0	0	0	0	5060	67.8	26.1	2.5977	3.69	22	18	305	568	0.4	223	1	0	0	0	0	0	0	0	24.5
0	22	1	1	0	0		0	0	0	0	0	0	0	0	0	0	0	0	0	0	0	0	0	3480	55.1	36.5	1.50959	1.97	29	15	288	411.2	0.4	142	1	0	0	0	1	0	0	1	21.74
0	62	0	1	1	0	1	1	0	1	0	0	0	0	0	0	0	0	0	0	0	0	0	1	7370	15	15	1	12.76	22	11	363	238.2	4.1	213	0	0	0	0	1	1	0	1	23.16
0	55	0	1	1	0	0	0	0	0	0	0	0	0	0	0	0	0	0	0	0	0	0	1	8330	84.6	9.8	8.63265	10.68	111	52	682	2678.6	1.5	276	1	0	0	0	1	0	0	1	27.03
0	48	1	1	0	0		1	1	1	0	0	0	0	0	0	0	0	0	0	0	0	0	1	6690	69.7	17.2	4.05233	6.02	31	31	304	832.7	0.2	251	1	0	0	0	0	0	0	0	25.76
0	48	1	1	1	0	0	0	0	0	0	0	0	0	0	0	0	0	0	0	0	0	0	1	6240	86.6	9.8	8.83673	4.26	36	18	322	1263.7	0.8	121	1	0	0	0	1	0	0	1	18.74
0	29	0	1	0	0		0	0	0	0	0	0	0	0	0	0	0	0	0	0	0	0	0	5700	76.9	29.1	2.64261	0.8	61	116	312	317.4	0.2	171	1	0	0	0	0	0	0	0	29.14
0	27	0	1	0	0		0	0	0	0	0	0	0	0	0	0	0	0	0	0	0	0	1	3930	61.3	30.5	2.00984	4.72	35	43	223	134.4	0.2	145	1	0	0	0	0	0	0	0	23.05
0	60	1	1	1	0	0	1	1	0	0	0	0	0	0	0	0	0	0	1	0	0	0	1	5400	66.5	26.1	2.54789	5.98	39	17	542	1198.6	1.4	112	1	0	0	0	0	0	0	1	28.7
0	59	1	1	0	0		1	1	0	0	0	0	0	0	0	0	0	0	0	0	0	0	0	5220	77.4	15.3	5.05882	5.01	31	19	342	495.5	0.8	208	1	0	0	0	1	0	0	1	23.12
0	56	0	1	0	0		0	0	0	0	0	0	0	0	0	0	0	0	0	0	0	0	1	3860	61	31	1.96774	2.17	30	19	289	203.1	0.1	141	1	0	0	1	0	0	0	0	22.48
0	49	1	1	0	0		0	0	0	0	0	0	0	0	0	0	0	0	0	0	0	0	1	4290	70.7	20.5	3.44878	2.98	32	59	255	372.1	0.1	141	1	0	0	0	0	0	0	0	26
0	47	0	1	0	0		0	0	0	0	0	0	0	0	0	0	0	0	0	0	0	0	1	3790	77.8	16.9	4.60355	5.84	29	29	297	182.8	0.3	106	1	0	0	0	0	0	0	1	17.15
0	52	1	1	1	0	2	0	0	0	0	0	0	0	0	0	0	0	0	0	0	0	0	1	4790	86.9	8.1	10.7284	11.26	53	39	626	1149.3	1	125	1	0	0	0	1	1	0	1	25.65
0	44	1	1	0	0		0	0	0	0	0	0	0	0	0	0	0	0	0	0	0	0	0	2590	57.1	32.8	1.74085	2.91	34	29	275	213.6	1.7	111	1	0	0	0	1	0	0	1	23.82
0	40	0	1	0	0		0	0	0	0	0	0	0	0	0	0	0	0	0	0	0	0	0	3860	73.1	19.9	3.67337	4.2	30	21	281	153.3	0.8	171	1	0	0	0	1	0	0	1	23.44
0	37	0	1	1	0	0	0	0	0	0	0	0	0	0	0	0	0	0	0	0	0	0	0	5270	73.4	20.7	3.54589	0.98	134	118	489	1032	1.1	221	1	0	0	0	1	0	0	1	23.54
0	60	1	1	0	0		1	1	1	0	0	0	0	0	0	0	0	0	1	0	0	0	0	3490	60.2	33.8	1.78107	2.64	38	43	253	112.9	0.9	110	0	0	0	1	0	0	0	0	31.01
0	47	0	1	0	0		0	0	0	0	0	0	0	0	0	0	0	0	0	0	0	0	0	3850	77.4	17.4	4.44828	2	24	7	242	22.4	0.3	194	1	0	0	0	0	0	0	0	19.4
0	31	1	1	1	0	0	1	0	0	0	1	0	0	0	0	0	0	0	0	0	0	0	0	7620	78.6	15.4	5.1039	7.73	85	116	567	891.1	1.2	171	1	0	0	0	1	0	0	1	26.56
0	55	1	1	1	0	0	1	0	1	0	1	0	0	0	0	0	0	0	0	0	0	0	1	5120	79.9	12.9	6.1938	7.07	27	23	355	756.8	0.6	166	1	0	0	0	1	1	0	1	30.83
0	48	0	1	0	0		0	0	0	0	0	0	0	0	0	0	0	0	0	0	0	0	1	5580	91.6	4.5	20.3556	6.73	20	17	400	184.8	0.8	154	1	0	0	0	1	0	0	1	20.54
0	46	0	1	1	0	0	1	0	0	0	0	0	0	0	1	0	0	0	0	0	0	0	1	6660	86.7	9.6	9.03125	19.19	56	39	401	518.4	0.5	158	1	0	0	0	1	1	0	1	22.14
0	41	0	1	1	0	0	0	0	0	0	0	0	0	0	0	0	0	0	0	0	0	0	0	4850	79	15	5.26667	4.89	26	16	356	317.2	1.7	145	1	0	0	0	1	0	0	1	25.64
0	40	1	1	0	0		1	1	0	0	1	0	0	0	0	0	0	0	0	0	0	0	1	4520	62.9	23.2	2.71121	0.05	35	73	210	450.9	0.1	259	0	0	0	1	0	0	0	0	30.05
0	40	1	1	1	0	2	0	0	0	0	0	0	0	0	0	0	0	0	0	0	0	0	1	5430	73.5	18.6	3.95161	11.21	43	31	546			149	1	0	0	0	1	1	0	1	28.53
0	36	1	1	0	0		1	1	0	0	0	0	0	0	0	0	0	0	1	0	0	0	1	6090	65	33	1.9697	10.39	100	72	986	4030.5	3.4	129	1	0	0	0	1	1	0	1	29.34
0	31	0	1	1	0	0	0	0	0	0	0	0	0	0	0	0	0	0	0	0	0	0	0	4070	86.7	10.1	8.58416	8.09	37	10	466	331.8	0.7	121	1	0	0	0	1	0	0	1	21.01
0	53	1	1	1	0	0	0	0	0	0	0	0	0	0	0	0	0	0	0	0	0	0	1	4930	72.2	21.1	3.4218	4.9	74	84	403	1294.4	1.1	98	1	0	0	0	1	1	0	1	25.67
0	53	1	1	0	0		0	0	0	0	0	0	0	0	0	0	0	0	0	0	0	0	0	6170	71.6	19.3	3.70984	2.9	22	18	162	307	0.4	191	1	0	0	0	1	0	0	1	24.4
0	36	1	1	0	0		0	0	0	0	0	0	0	0	0	0	0	0	0	0	0	0	1	7100	79.8	13.7	5.82482	10.25	99	99	394	630.8	0.6	150	1	0	0	0	1	0	0	1	25.34
0	34	1	1	0	0		1	0	0	1	0	0	0	0	0	0	0	0	0	0	0	0	0	5070	79.7	11.2	7.11607	1.24	31	25	325	910.1	0.1	167	0	0	0	1	0	0	0	1	18.26
0	45	0	1	0	0		0	0	0	0	0	0	0	0	0	0	0	0	0	0	0	0	1	8350	68.4	22.5	3.04	3.78	26	21	325	35.9	0.5	266	1	0	0	0	0	0	0	0	30.46
0	40	1	1	0	0		1	0	0	0	1	0	0	0	0	0	0	0	0	0	0	0	1	5420	72.1	22.3	3.23318	3.26	22	22	253	820.2	0.1	144	0	0	0	1	0	0	0	1	29.26
0	33	1	1	0	0		0	0	0	0	0	0	0	0	0	0	0	0	0	0	0	0	0	3930	58.4	33.6	1.7381	2.39	154	148	511	1129.9	2.1	147	1	0	0	0	0	0	0	0	23
0	29	1	1	1	0	0	0	0	0	0	0	0	0	0	0	0	0	0	0	0	0	0	0	4590	72.2	17.6	4.10227	1.99	71	120	273	362.8	1	160	0	0	0	1	0	0	0	1	31
0	22	1	1	0	0		0	0	0	0	0	0	0	0	0	0	0	0	0	0	0	0	0	4420	65.1	24.4	2.66803	3.26	37	43	306	293.2	0.3	125	1	0	0	0	0	0	0	0	23
0	61	1	1	0	0		0	0	0	0	0	0	0	0	0	0	0	0	0	0	0	0	1	2790	50.5	30.8	1.63961	2.1	20	15	182	142.3	0.3	163	1	0	0	0	0	0	0	0	19.13
0	49	1	1	1	0	0	1	0	0	0	0	0	0	0	0	0	0	0	1	0	0	0	0	6510	75.9	16.7	4.54491	17.24	25	12	304	446.9	0.2	147	1	0	0	1	1	1	0	1	27.26
0	43	0	1	0	0		0	0	0	0	0	0	0	0	0	0	0	0	0	0	0	0	0	4170	70.6	19.4	3.63918	1.96	32	33	192	71.5	0.2	197	0	0	0	1	0	0	0	0	29
0	38	0	1	0	0		0	0	0	0	0	0	0	0	0	0	0	0	0	0	0	0	1	4160	73.8	39.9	1.84962	1.85	22	15	234	93.4	0.2	170	1	0	0	0	0	0	0	0	23.92
0	43	0	1	1	0	0	0	0	0	0	0	0	0	0	0	0	0	0	0	0	0	0	0	4160	73.8	20.4	3.61765	0.29	17	17	207	24.9	1.2	175	0	0	0	1	0	0	0	1	40.51
0	43	0	1	0	0		0	0	0	0	0	0	0	0	0	0	0	0	0	0	0	0	1	3470	80	12	6.66667	2.74	26	12	258	91.4	0.6	98	0	0	0	0	1	0	0	1	18.33
0	55	0	1	1	0	0	0	0	0	0	0	0	0	0	0	0	0	0	0	0	0	0	0	3490	73.9	20.6	3.58738	0.57	35	19	399	465.8	1.2	146	1	0	0	0	1	0	0	1	20.12
0	66	1	1	0	0		0	0	0	0	0	0	0	0	0	0	0	0	0	0	0	0	1	3220	65.8	19.6	3.35714	3.84	25	17	203	266.1	0.6	159	0	0	0	0	0	0	0	0
0	57	1	1	1	0	0	1	0	1	0	0	0	0	0	0	0	0	0	0	0	0	0	1	6640	73.9	17.8	4.15169	3.6	40	36	322	803.1	0.7	176	1	0	0	1	1	0	0	1	29.37
0	34	0	1	0	0		0	0	0	0	0	0	0	0	0	0	0	0	0	0	0	0	0	3840	79.9	15.1	5.29139	2.75	20	52	229	55.8	0.5	136	1	0	0	0	1	0	0	1	22
0	49	1	1	0	0		0	0	0	0	0	0	0	0	0	0	0	0	0	0	0	0	1	4160	61.7	25.5	2.41961	8.22	27	21	263	700.9	0	125	1	0	0	0	1	0	0	1	21.79
0	27	1	1	0	0		0	0	0	0	0	0	0	0	0	0	0	0	0	0	0	0	1	5410	73.3	16.1	4.5528	0.19	32	47	200			210	0	0	0	0	0	0	0	1	24.63
0	59	1	1	1	0	0	0	0	0	0	0	0	0	0	0	0	0	0	0	0	0	0	1	5730	78.8	14.7	5.36054	9.33	45	34	267	567.5	1.2	132	1	0	0	0	1	1	0	1	20.57
0	43	1	1	0	0		1	0	0	0	0	0	0	0	0	0	0	0	1	0	0	0	1	5960	67	14.4	4.65278	0.38	22	36	152	385.6	0.3	167	1	0	0	1	1	0	0	1	25.8
0	49	0	1	0	0		0	0	0	0	0	0	0	0	0	0	0	0	0	0	0	0	0	3810	57.4	34.9	1.6447	1.16	22	15	221	66.5	0.2	173	0	0	0	0	0	0	0	0	20.9
0	75	1	1	1	0	0	1	0	0	0	0	0	0	0	0	1	0	0	0	1	0	0	0	9920	93	5	18.6	9.68	138	80	270			94	1	0	0	0	0	0	0	1
0	93	0	1	1	0	0	1	0	1	0	0	0	0	0	0	0	0	0	0	0	0	0	0	1930	87	9	9.66667	9.21	18	6	188	50.6	0.2	136	1	0	0	0	0	0	0	1	27.3
0	55	1	1	0	0		1	0	0	0	0	0	0	0	0	0	0	0	1	0	0	0	1	5100	55.3	32	1.72812	2.43	33	45	204	632.6	0.2	182	1	0	0	0	1	1	0	1	25.78
0	91	0	1	0	0		1	0	1	0	0	1	0	0	1	0	0	0	1	0	0	0	1	5750	77.5	18.3	4.23497	8.46	37	19	171	95.2	3.7	113	1	0	0	0	0	0	0	1
0	56	0	1	1	0	0	0	0	0	0	0	0	0	0	0	0	0	0	0	0	0	0	0	5800	74.6	18.8	3.96809	9.14	39	24	291	443.3	0.1	155	1	0	0	0	1	0	0	1	23.31
0	39	1	1	0	0		0	0	0	0	0	0	0	0	0	0	0	0	0	0	0	0	1	4600	80.5	15	5.36667	6.07	39	40	349	740.6	0.2	213	1	0	0	0	1	0	0	1	25.92
0	68	1	1	0	0		1	0	1	0	0	0	0	0	0	0	0	0	0	0	0	0	1	5190	78.4	16.4	4.78049	5.63	60	63	419	1277	0.1	141	1	0	0	0	0	0	0	0
0	73	1	1	1	0	2	1	0	1	0	1	1	0	0	0	0	0	0	0	0	0	0	1	5680	79.3	16.4	4.83537	6.59	58	32	801	771.2	1.2	209	1	0	0	0	1	0	0	1	20.96
0	52	1	1	0	0		0	0	0	0	0	0	0	0	0	0	0	0	0	0	0	0	1	3840	63.7	28.4	2.24296	2.74	36	41				140	1	0	0	0	0	0	0	1	26.46
0	48	1	1	0	0		0	0	0	0	0	0	0	0	0	0	0	0	0	0	0	0	0	4630	61.8	32	1.93125	4.81	36	61	248			108	1	0	0	0	0	0	0	1	25.57
0	95	0	1	0	0		1	0	1	0	0	0	0	0	0	1	0	0	0	0	0	0	0	4380	71.3	22.8	3.12719	3.21	26	12	245			113	1	0	0	0	0	0	0	1	18.11
0	82	1	1	1	0	1	1	1	0	0	1	0	0	0	0	0	0	0	0	0	0	0	0	4610	75.5	16.9	4.46746	12.94	36	16	409	191		168	1	0	0	0	0	0	0	1
0	46	1	1	0	0		1	0	1	0	0	0	0	0	0	0	0	0	0	0	0	0	1	7380	75.7	14	5.40714	3.52	27	27	268	576.9	1	186	1	0	0	0	1	0	0	1	30.14
0	69	1	1	0	0		1	0	0	0	0	0	0	0	0	0	0	0	1	0	0	0	0	3850	57.1	36.9	1.54743	2.76	60	45	363	524.4	1.5	97	1	0	0	0	0	0	0	1	32.44
0	72	1	1	1	0	0	1	0	0	0	0	0	0	0	0	0	0	0	1	0	0	0	1	3310	61	28.4	2.14789	2.43	29	23	245			123	1	0	0	0	1	0	0	1	24.16
0	41	1	1	0	0		0	0	0	0	0	1	0	0	0	0	0	0	0	0	0	0	0	5460	54	36.4	1.48352	2.53	36	56	248	313.7	0.5	143	1	0	0	0	0	0	0	0
0	70	0	1	0	0		1	0	0	0	1	0	0	0	0	1	0	0	0	0	0	0	1	5080	65.9	24.4	2.70082	1.45	39	114	348	231.6	1.6	310	0	0	0	0	0	0	0	0
0	46	1	1	1	0	1	0	0	0	0	0	0	0	0	0	0	0	0	0	0	0	0	1	2600	66.6	24.6	2.70732	3.62	51	32	433	749.2	0.4	152	1	0	0	0	1	0	0	1	30.39
0	35	0	1	0	0		1	0	0	0	1	0	0	0	0	0	0	0	0	0	0	0	0	2220	81	13	6.23077	2.03	23	14	303	102.9	0.3	134	1	0	0	0	0	0	0	0
0	76	1	1	0	0		1	0	0	0	0	1	0	0	0	0	0	0	0	0	0	0	1	7320	67.4	19.5	3.45641	0.9	24	16	198			307	1	0	0	0	0	0	0	1	28.84
0	83	1	1	1	0	0	0	0	0	0	0	0	0	0	0	0	0	0	0	0	0	0	0	5360	91	0.1	910	12.4	38	17	406		4.3	136	1	0	0	0	0	0	0	1
0	72	0	1	0	0		0	0	0	0	0	0	0	0	0	0	0	0	0	0	0	0	0	3250	67	24	2.79167	0.68	31	24	309			383	1	0	0	0	0	0	0	1	16.7
0	53	0	1	1	0	0	0	0	0	0	0	0	0	0	0	0	0	0	0	0	0	0	0	4290	76.7	17.7	4.33333	5.11	45	40	292	310.2	0.8	121	1	0	0	0	1	0	0	1	31.64
0	51	0	1	0	0		0	0	0	0	0	0	0	0	0	0	0	0	0	0	0	0	0	5620	64.6	23.5	2.74894	7.41	32	36	234			407	1	0	0	0	0	0	0	0
0	86	0	1	1	0	0	1	0	0	0	0	0	0	0	0	0	0	0	1	0	0	0	0	9630	77.3	15.4	5.01948	0.87	23	16	180	87.4	2.3	167	1	0	0	0	0	0	0	1	29.16
0	63	1	1	1	0	0	1	0	0	0	0	1	0	0	1	0	0	0	0	0	0	0	1	1980	47	47	1	9.97	37	22	195			144	1	0	0	0	0	0	0	1	18.42
1	79	1	0	0	0		1	0	1	0	0	0	0	0	1	0	0	0	1	0	2	1		2160	44	39	1.12821	1.27	24	14	208	274.5	1.6	99	0	0	0	0	0	0	1	1	19.7
1	28	1	0	0	0		0	0	0	0	0	0	0	0	0	0	0	0	0	0	3	1	0	10810	80.6	11.7	6.88889	16.08	16	12	157	404.5	0.3	211	0	0	0	0	0	0	0	0	21.7
1	59	1	0	0	0		0	0	0	0	0	0	0	0	0	0	0	0	0	0	2	1	1	4030	43.5	43.9	0.990888	0.84	37	37	181	641.1	0	148	0	0	0	0	0	0	0	0	20.9
1	53	1	0	0	0		1	0	0	0	0	1	0	0	0	0	0	0	0	0	2	1	1	13070	70.7	23.3	3.03433	0.06	59	22	212	183.1	0.1	204	0	0	0	0	0	0	0	0	25.2
1	49	0	0	0	0		1	0	1	0	0	0	0	0	0	0	0	0	1	0	2	1	1	5250	78	14.9	5.2349	0.94	31	33	197	44.2	0	171	0	0	1	0	0	0	0	0	33.5
1	92	0	0	0	0		1	0	0	0	0	0	0	0	0	0	0	0	0	1	3	1		6920	55	35.5	1.5493	0.86	17	8	164	157	1.3	193	0	0	0	0	0	0	0	1
1	40	0	0	0	0		0	0	0	0	0	0	0	0	0	0	0	0	0	0	2	1	1	2960	36.4	55.1	0.660617	0.26	16	12	135			193	0	0	0	0	0	0	0	0	21.8
1	34	1	0	0	0		0	0	0	0	0	0	0	0	0	0	0	0	0	0	2	1	1	5610	85.5	6.8	12.5735	0.45	19	14	171	82.5	0.2	214	0	0	0	0	0	0	0	0	19.6
1	61	1	0	0	0		1	0	0	0	0	0	0	0	0	0	0	0	0	1	2	1	1	6020	59.7	24.8	2.40726	4.04	31	15	219	356.7	0.3	159	0	0	1	0	0	0	0	0	22.6
1	20	0	0	0	0		1	0	0	0	0	1	0	0	0	0	0	0	0	0	2	1		5790	69.7	20.6	3.3835	2.06	14	10	178		0.3	188	0	0	1	0	0	0	0	0	21.9
1	37	1	0	0	0		0	0	0	0	0	0	0	0	0	0	0	0	0	0	2	1		6090	62.4	26.1	2.3908	1.81	52	85	200					0	0	0	0	0	0	0
1	46	0	0	0	0		1	0	0	0	0	0	0	0	0	0	1	0	0	0	2	1	0	5430	73.9	16.9	4.37278	1.33	13	12	160	5.1	0.3	342	0	0	0	0	0	0	0	0	23.2
1	52	1	0	0	0		1	0	0	0	0	0	0	0	0	0	0	0	1	0	2	1	1	3260	76.4	12.6	6.06349	1.8	27	26	203	32.7	0.8	141	0	0	1	0	0	0	0	0	26.6
1	52	1	0	0	0		0	0	0	0	0	0	0	0	0	0	0	0	0	0	2	1	0	5200	68.6	23.1	2.9697	5.71	22	30	178	533.8	0.3	197	0	0	0	0	0	0	0	1	23
1	34	0	0	0	0		1	0	0	0	0	0	0	0	0	0	0	0	1	0	2	1	1	5490	68.7	21.3	3.22535	1.48	51	90	187	217.7		226	0	0	0	0	0	0	0	0	26.6
1	84	0	0	1	0	0	1	0	1	0	0	0	1	0	0	0	0	0	0	0	2	1	1	5970	53.3	35	1.52286	2.07	14	6	201	21.3	1.3	162	0	0	1	0	0	0	0	1	20
1	73	1	0	0	0		0	0	0	0	0	0	0	0	0	0	0	0	0	0	2	1	1	5830	65.8	20.2	3.25743	0.23	28	27	216	123.9	0.9	130	0	1	0	0	0	0	0	0	24.3
1	45	0	0	0	0		0	0	0	0	0	0	0	0	0	0	0	0	0	0	2	1	0	3680	70.9	14.1	5.02837	0.02	20	13	106	10.7	0.5	195	0	0	0	0	0	0	0	0
1	84	1	0	0	0		1	0	0	0	0	0	0	0	0	0	0	0	1	0	2	1	1	4830	49.9	40.8	1.22304	4	23	16	173			109	0	0	0	0	0	0	0	0
1	55	0	0	0	0		0	0	0	0	0	0	0	0	0	0	0	0	0	0	2	1	1	6720	56.5	36.5	1.54795	0.07	19	17	190			311	0	0	0	0	0	0	0	0	22.3
1	44	1	0	0	0		0	0	0	0	0	0	0	0	0	0	0	0	0	0	2	1	0	3210	34.2	54.2	0.630996	0.46	41	73	206				0	0	0	0	0	0	0	0	26.5
1	34	1	0	0	0		0	0	0	0	0	0	0	0	0	0	0	0	0	0	2	1	0	8780	73.3	17.2	4.26163	6	34	64	205			179	0	0	0	0	0	0	0	0	25.8
1	67	1	0	0	0		1	0	1	0	0	0	0	0	0	0	0	0	0	1	3	1	0	7880	84.3	9.1	9.26374	1.36	23	23	185	110.6	1	185	0	1	0	0	0	0	0	0	24.5
1	43	1	0	0	0		0	0	0	0	0	0	0	0	0	0	0	0	0	0	2	1		5020	55.1	35.1	1.5698	1.16	21	23	169	137.2	0.5	138	0	0	0	0	0	0	0	0
1	98	0	0	0	0		1	0	1	0	0	0	0	0	0	0	0	0	1	1	3	1	0	5440	69.2	21.9	3.15982	0.56	15	9	192	80.1	4.8	158	0	0	0	0	0	0	0	1
1	39	0	0	0	0		1	0	0	0	1	0	0	0	0	0	0	0	0	0	3	1	0	3990	43.8	35.6	1.23034	0.48	46	88	239	126.3	0	239	0	0	0	0	0	0	0	0	28.8
1	31	1	0	0	0		0	0	0	0	0	0	0	0	0	0	0	0	0	0	2	1	1	9110	82.3	10.2	8.06863	6.31	160	119	224	284.6	0.7	173	0	0	0	0	0	0	0	0	20.5
1	75	0	0	0	0		0	0	0	0	0	0	0	0	0	0	0	0	0	0	2	1	0	8920	73.3	21.1	3.47393	0.45	20	8	223			171	0	0	0	0	0	0	0	1	25.5
1	85	1	0	0	0		1	0	0	0	1	0	0	0	0	0	0	0	0	1	3	1	0	4260	49.5	34	1.45588	0.18	22	14	165	64.2	0.1	163	0	0	0	0	0	0	0	0	25.7
1	58	0	0	0	0		1	0	1	0	0	0	0	0	0	0	0	0	1	0	2	1	0	5290	72.4	16.6	4.36145	1.01	25	31	205	96.4	1.3	72.4	0	1	0	0	0	0	0	0	31.14
1	35	0	0	0	0		1	0	0	0	1	0	0	0	0	0	0	0	0	0	2	1	1	5380	55.3	36.1	1.53186	0.06	22	17	159	34.3	0.4	227	0	0	0	0	0	0	0	0	17.2
1	50	0	0	0	0		0	0	0	0	0	0	0	0	0	0	0	0	0	0	2	1	0	8090	74.7	20.5	3.6439	0.11	15	13	168			297	0	0	0	0	0	0	0	0	26.05
1	93	0	0	0	0		1	0	1	1	0	0	0	0	0	0	0	0	0	0	3	1	0	6250	53	38.7	1.36951	0.36	24	12	194	116.6	7.6	184	0	0	1	0	0	0	0	1	21
1	86	1	0	0	0		1	0	0	0	0	1	0	0	1	0	0	0	1	0	2	1	1	5090	66.2	25.9	2.55598	4.52	16	6	165	202.6	0.9	141	0	0	0	0	0	0	1	0	26.4
1	84	0	0	0	0		1	0	1	0	1	0	0	0	0	0	0	0	0	0	2	1	0	5190	68.1	19.8	3.43939	0.26	17	9	175	50.7	0.4	155	0	1	0	0	0	0	0	0	23.7
1	45	0	0	0	0		1	0	0	0	1	0	0	0	0	0	0	0	0	0	2	1	0	5680	63.3	26.8	2.36194	0.02	42	35	213			300	0	0	0	0	0	0	0	0	21.4
1	58	1	0	0	0		0	0	0	0	0	0	0	0	0	0	0	0	0	0	2	1		10680	78.1	14	5.57857	0.43	35	35	195	276.9	0.5	343	0	0	0	0	0	0	0	0	28.6
1	74	1	0	0	0		0	0	0	0	0	0	0	0	0	0	0	0	0	0	2	1	1	5690	62.5	30.1	2.07641	0.35	25	17	192	73.2	0.6	182	0	0	1	0	0	0	0	0	22.8
1	64	1	0	0	0		1	0	0	0	0	0	0	1	0	0	0	0	0	0	2	1	0	4390	65.1	23	2.83043	3.31	252	99	306	2196.2	0.9	127	0	0	1	0	0	0	0	0	19.5
1	54	0	0	0	0		0	0	0	0	0	0	0	0	0	0	0	0	0	0	2	1	0	5280	68.9	23.1	2.98268	0.05	15	12	207	168.1	0	324	0	0	0	0	0	0	0	0	21.4
1	35	0	0	0	0		0	0	0	0	0	0	0	0	0	0	0	0	0	0	2	1	1	6950	68.6	24	2.85833	4	29	32	170	53.7	0.5	218	0	0	0	0	0	0	0	0	32
1	92	1	0	0	0		1	0	0	0	0	0	0	0	0	0	0	0	0	1	3	1		4820	67.5	19.5	3.46154	0.68	22	14	214	142.2	7.1	156	0	0	0	0	0	0	0	1
1	55	0	0	0	0		1	0	0	0	0	0	0	0	0	0	0	1	0	0	2	1		8690	73.1	19	3.84737	1.14	20	14	214	236.5	0.1	181	0	0	0	0	0	0	0	1	28.6
1	97	0	0	0	0		1	0	0	1	0	0	0	0	0	0	0	0	0	1	2	1		7130	83.4	10.9	7.65138	0.51	32	17	310	121.5	2.5	259	0	0	0	0	0	0	0	1
1	93	0	0	0	0		1	0	1	0	0	0	0	0	1	0	0	0	0	1	2	1		6530	73.9	20.5	3.60488	3.62	18	9	179	91	2.1	265	0	0	1	0	0	0	0	0
1	75	1	0	0	0		0	0	0	0	0	0	0	0	0	0	0	0	0	0	2	1	1	8190	67.1	24.4	2.75	0.45	27	16	216	288.6	0.6	182	0	0	0	0	0	0	0	0	25.4
1	68	0	0	0	0		1	0	1	0	0	0	0	0	0	0	0	0	0	1	2	1	0	3230	62.2	25.4	2.44882	2.6	18	7	243	112.9	0.5	168	0	0	0	0	0	0	0	0	20.1
1	61	0	0	0	0		1	0	1	0	0	0	0	0	0	0	0	0	0	0	2	1		3330	59.5	31.8	1.87107	0.22	24	22	163	196.9	0	213	0	1	0	0	0	0	0	0	20.1
1	59	1	0	0	0		1	0	1	0	0	0	0	0	0	0	0	0	1	1	2	1	1	10690	73.8	14.7	5.02041	6.95	24	26	254	485.5	0.5	362	1	0	0	0	0	0	0	0
1	70	1	0	0	0		1	0	1	0	0	0	0	0	0	0	0	0	0	0	2	1	0	7350	78.3	10.6	7.38679	0.8	25	14	189	252.1	2.9	148	0	0	0	0	0	0	0	0	20.3
1	57	1	0	0	0		1	0	1	0	0	0	0	0	0	0	0	0	1	0	2	1	0	6740	53.3	37.2	1.4328	0.46	27	46	151	1219.9	0	107	0	1	0	0	0	0	0	0	23.4
1	92	1	0	0	0		1	0	1	0	0	0	0	0	0	0	0	0	0	1	3	1		5160	76.3	14	5.45	3.71	17	10	177	207.8	0.7	243	0	1	0	0	0	0	0	1
1	95	0	0	0	0		1	0	1	0	0	0	0	0	0	0	0	0	0	0	2	1		6800	68.7	25.3	2.71542	0.22	29	23	203	148.7	1	162	0	0	1	0	0	0	0	0	27.2
1	90	1	0	0	0		1	0	0	0	0	0	0	0	1	0	0	0	0	1	2	1		2710	56.8	32.5	1.74769	0.89	68	25	264	253.1	11.3	102	0	0	0	0	0	0	1	1	20.8
1	83	0	0	0	0		1	1	1	0	0	0	0	0	0	0	0	0	0	0	2	1	0	4600	53.5	39.1	1.36829	0.13	28	16	214	169.9	0.7	178	0	0	1	0	0	0	0	0	26.6
1	74	1	0	0	0		0	0	0	0	0	0	0	0	0	0	0	0	0	0	2	1		6080	73	18.9	3.86243	5	40	35	190	276.1	0.5	128	0	0	1	0	0	0	0	0	23.5
1	56	0	0	0	0		0	0	0	0	0	0	0	0	0	0	0	0	0	0	2	1		5880	62.3	30.1	2.06977	0.02	16	23	160	118.2	0.3	328	0	0	0	0	0	0	0	0	23.3
1	47	1	0	0	0		1	0	0	0	0	0	0	1	0	0	0	0	0	0	2	1		5210	65	19.6	3.31633	0.09	39	43	224	366.8	0.2	151	0	0	0	0	0	0	0	0	22.3
1	87	1	0	0	0		1	0	0	0	0	1	0	0	0	0	0	0	0	0	2	1	0	6820					20	10	175				0	0	1	0	0	0	0	0	23.5
1	37	1	0	0	0		0	0	0	0	0	0	0	0	0	0	0	0	0	0	2	1	1	9010	68.5	20.9	3.27751	1.91	57	121	216				0	0	0	0	0	0	0	0	30.1
1	42	0	0	0	0		0	0	0	0	0	0	0	0	0	0	0	0	0	0	2	1	1	8170	64.3	29	2.21724	0.17	33	42	166	8.6	0.2	414	0	0	0	0	0	0	0	0	35.4
1	34	0	0	0	0		0	0	0	0	0	0	0	0	0	0	0	0	0	0	2	1	0	4250	72.7	19.1	3.80628	4.86	18	15	162	130.9	1.1	159	0	0	0	0	0	0	0	0	24.5
1	52	1	0	0	0		1	1	1	0	0	1	0	0	0	0	0	0	0	0	2	1		4970	58.8	32.4	1.81481	0.1	25	31	173		0	326	0	0	0	0	0	0	0	0	23.2
1	43	1	0	0	0		1	0	0	0	0	0	0	0	0	0	0	0	1	0	2	1	0	5030	56.6	29.2	1.93836	1.4	21	37	157	208.5	0.1	232	0	0	1	0	0	0	0	0	32.4
1	93	0	0	0	0		0	0	0	0	0	0	0	0	0	0	0	0	0	0	2	1	0	4050	64.9	25.7	2.52529	0.2	23	13	133	78.8	3.9	171	0	0	0	0	0	0	0	1	21.5
1	80	0	0	0	0		1	0	1	0	0	0	0	0	0	0	0	0	0	0	2	1	0	4720	66.3	24.4	2.71721	4.32	29	21	190	41.1	1.1	110	0	0	0	0	0	0	0	1	23.8
1	67	1	0	0	0		1	0	1	0	0	0	0	0	0	0	0	0	1	0	2	1	1	3660	57	31.1	1.8328	1.13	41	56	200	278.4	0.4	146	0	0	1	0	0	0	0	0	24.4
1	58	0	0	0	0		1	0	1	0	0	0	0	0	0	0	0	0	0	0	2	1		3330	42.7	45.9	0.930283	0.42	42	37	200	238.3	0.5	227	0	0	0	0	0	0	1	0	34.2
1	46	1	0	0	0		0	0	0	0	0	0	0	0	0	0	0	0	0	0	2	1		5990	73.5	14.5	5.06897	0.84	15	15	149	99.6	0.1	195	0	0	0	0	0	0	0	0	24.7
1	42	1	0	0	0		0	0	0	0	0	0	0	0	0	0	0	0	0	0	2	1	0	9970	82.6	8.7	9.49425	6.57	19	17	166	246.9	0.4	207	0	0	0	0	0	0	0	1	22
1	37	0	0	0	0		0	0	0	0	0	0	0	0	0	0	0	0	0	0	2	1	0	3830	43.6	43.1	1.0116	0.07	19	17	174		0.3	169	0	0	0	0	0	0	0	0	20.3
1	43	0	0	0	0		0	0	0	0	0	0	0	0	0	0	0	0	0	0	2	1	0	2920	58.2	34.6	1.68208	0.91	17	12	173	9.2	1.1	256	0	0	0	0	0	0	0	0	17.4
1	73	1	0	0	0		1	1	1	0	0	1	0	0	0	0	0	0	0	0	2	1	0	6500	51	37.2	1.37097	0.74	54	48	207			143	0	0	1	0	0	0	0	0	30.1
1	42	0	0	0	0		0	0	0	0	0	0	0	0	0	0	0	0	0	0	1	1	1	2970	43.5	43.1	1.00928	0.09	17	10	175	21.3	0	249	0	0	0	0	0	0	0	1	24.4
1	64	0	0	0	0		1	0	0	0	0	0	0	0	0	0	0	0	1	0	2	1	0	7650	6464	7.8	828.718	6.21	19	20	162	130.5	0.3	126	0	0	0	0	0	0	1	1	21.9
1	45	0	0	0	0		1	0	0	0	1	0	0	0	0	0	0	0	0	0	2	1	0	3280	71.3	17.4	4.0977	0.08	16	10	176			289	0	0	0	0	0	0	0	0	20.7
1	76	0	0	0	0		1	0	1	0	0	1	0	1	0	0	0	0	0	0	2	1	0	5100	55.6	32.4	1.71605	0.37	25	16	236	60.7	8.4	318	0	0	0	0	0	0	0	0	25.3
1	71	0	0	0	0		1	1	1	0	1	0	0	0	0	0	0	0	0	0	2	1	0	10350	75.1	17.4	4.31609	0.55	15	13	197	95.6	2.9	277	0	0	0	0	0	0	0	1	22.3
1	67	1	0	0	0		1	0	1	0	0	0	0	0	0	0	0	0	1	0	2	1	1	6620	74.5	14.8	5.03378	0.87	28	42	210	130.9	0.9	253	0	0	0	0	0	0	1	1	27.7
1	35	0	0	0	0		1	0	0	0	0	0	0	0	1	0	0	0	0	0	2	1	0	5010	77.8	12.2	6.37705	1.43	15	16	188	7.8	1.2	248	0	0	0	0	0	0	0	0	30.1
1	73	1	0	0	0		1	0	1	0	0	0	0	0	0	0	0	0	0	0	2	1		2810	47.7	36.3	1.31405	0.28	26	23	173	159		185	0	0	1	0	0	0	0	0	19
1	64	1	0	0	0		1	0	0	0	0	0	0	1	0	0	0	0	0	0	3	1	0	6850	78.3	12.3	6.36585	1.07	20	20	204	147.9	0	155	0	0	0	0	0	0	1	0	19.2
1	36	0	0	0	0		0	0	0	0	0	0	0	0	0	0	0	0	0	0	2	1	0	5960	72.7	19.8	3.67172	7.26	22	18	126	102.6	0.9	212	0	0	0	0	0	0	0	0	20.6
1	67	1	0	0	0		1	0	0	0	0	0	0	0	1	0	0	0	0	0	3	1	1	6470	67.7	21.2	3.1934	2.09	23	23	189		0.4	212	0	0	1	0	0	0	0	0	23.7
1	34	1	0	0	0		0	0	0	0	0	0	0	0	0	0	0	0	0	0	0	0	0	4140	59.6	30.4	1.96053	0.19	18	14	137	169.6	0.1	158	0	0	0	0	0	0	0	0	19.3
1	39	0	0	0	0		1	0	0	0	1	0	0	0	0	0	0	0	0	1	0	0		2790	63.4	15.8	4.01266	0.04	18	14	170			205	0	0	1	0		0	0	0	21.4
1	68	1	0	0	0		1	0	1	0	0	0	0	0	0	0	0	0	1	0	0	0		5900	51.5	37.6	1.36968	0.82	34	47	214	244	0.1	185	0	1	0	0	0	0	0	0	25.1
1	46	1	0	0	0		0	0	0	0	0	0	0	0	0	0	0	0	0	0	0	0	1	5810	66.4	23.4	2.83761	1.56	42	40	164	293	1.1	174	0	0	0	0	0	0	0	0	23.5
1	42	1	0	0	0		1	0	0	1	0	0	0	0	0	0	0	1	0	0	0	0		6820	76.7	10	7.67	0.69	19	15	201	195.6	1.1	205	0	0	0	0	0	0	1	1	20.5
1	52	1	0	0	0		1	0	1	0	0	0	0	0	0	0	0	0	0	0	0	0	1	4480	50.6	37.1	1.36388	0.58	22	30	188	148.9	1	180	0	0	0	0	0	0	0	0	32.9
1	41	0	0	0	0		0	0	0	0	0	0	0	0	0	0	0	0	0	0	0	0	0	2510	51	35	1.45714	0.21	18	14	155	7.3	0.3	235	0	0	0	0	0	0	0	0	21.1
1	35	0	0	0	0		1	0	0	0	1	0	0	0	0	0	0	0	0	0	0	0	0	5780	67	26.3	2.54753	2.65	14	9	155	96.5	0.4	185	0	0	0	0	0	0	0	1	19.9
1	43	1	0	0	0		1	0	1	0	0	1	0	0	0	0	0	0	0	0	0	0	1	6290	67.7	16.7	4.05389	0.5	168	140	323			233	0	0	0	0	0	0	1	0	35.4
1	57	0	0	0	0		0	0	0	0	0	0	0	0	0	0	0	0	0	0	0	0	0	6050	58.7	30.9	1.89968	0.4	23	13	204			306	0	0	0	0	0	0	0	0	20.3
1	34	0	0	0	0		0	0	0	0	0	0	0	0	0	0	0	0	0	0	0	0	0	3300	77.2	15.8	4.88608	1.83	47	32	176				0	0	0	0	0	0	0	0	21.7
1	32	1	0	0	0		0	0	0	0	0	0	0	0	0	0	0	0	0	0	0	0		11670	73.7	11.1	6.63964	0.24	80	88	236			156	0	0	0	0	0	0	0	0	31.2
1	77	1	0	0	0		1	0	0	0	0	0	0	0	0	0	0	0	1	0	0	0	0	3260	51.2	30.7	1.66775	0.45	25	16	189	198.6	0.3	104	0	0	0	0	0	0	1	0	20.6
1	81	0	0	0	0		1	0	1	0	0	1	0	0	0	0	0	0	0	0	0	0	0	5540	62.4	21.7	2.87558	0.85	43	21	206	29.4	1.7	130	0	0	0	0	0	0	1	1	34.6
1	76	1	0	0	0		1	0	1	0	0	0	0	0	1	0	0	0	0	0				4320	61.6	27.1	2.27306	3.22	49	35	243	909.2	0.6	255	0	0	0	0	0	0	0	1	18.5
1	36	0	0	0	0		0	0	0	0	0	0	0	0	0	0	0	0	0	0	0			4990	78.8	14.6	5.39726	0.22	16	10	172	40.5	0.2	128	0	0	0	0	0	0	0	0
1	31	0	0	0	0		0	0	0	0	0	0	0	0	0	0	0	0	0	0	0		0	2280	46	39	1.17949	0.13	35	21	167	55.3	0.9	127	0	0	0	0	0	0	0	1	20.4
1	21	0	0	0	0		0	0	0	0	0	0	0	0	0	0	0	0	0	0			1	8040	82.6	6.6	12.5152	0.07	15	12	194		0	334	0	0	0	0	0	0	0	0	24.4
1	90	0	0	0	0		1	0	1	0	0	0	0	0	0	0	0	0	0	1			0	4460	61.9	27.6	2.24275	0.21	22	14	204	26.5	1.2	209	0	0	0	0	0	0	0	1
0	54	1	0	0	0		1	0	1	0	0	0	0	0	0	0	0	0	0	0	2	1	1	7120	65.8	19.5	3.37436	0.58	18	26	178	122.1	0.1	227	0	0	0	1	0	0	0	0	26.4
0	54	0	0	0	0		1	0	0	0	1	0	0	0	0	0	0	0	0	0	1	1	0	5140	63	26.1	2.41379	4.16	20	6	185	91.4	0.3	210	0	0	0	1	0	0	0	0	20.3
0	53	1	0	0	0		0	0	1	0	0	0	0	0	0	0	0	0	0	0	2	1	0	4980	67.5	21.7	3.1106	0.15	67	32	199	341.5	1.2	266	0	0	0	1	0	0	0	0	22.3
0	71	1	0	0	0		1	1	1	0	0	1	0	0	0	0	0	0	0	0	2	1	0	4230	49.6	36.2	1.37017	0.38	27	19	228	97.4	0.3	215	0	0	0	1	0	0	0	0	24.2
0	44	1	0	0	0		0	0	0	0	0	0	0	0	0	0	0	0	0	1	1	1	0	5750	75.4	11.7	6.44444	0.07	70	70	229	11	0.5	277	0	0	0	1	0	0	0	0	20.6
0	56	1	0	0	0		0	0	0	0	0	0	0	0	0	0	0	0	0	0	1	1	0	5660	82.3	12	6.85833	4.31	27	35	215	345.6	0.3	149	0	0	0	1	0	0	0	0
0	43	1	0	0	0		0	0	0	0	0	0	0	0	0	0	0	0	0	0	1	1	0	4500	64	23.3	2.74678	1.66	22	24	169	91.7	0.4	205	0	0	0	1	0	0	0	1	20
0	52	1	0	0	0		0	0	0	0	0	0	0	0	0	0	0	0	0	0	1	1	1	6360	80.4	9.1	8.83516	1.17	25	35	193	245.2	0.3	155	0	0	0	1	0	0	0	0	25.5
0	24	1	0	0	0		1	0	0	0	0	0	0	0	0	0	0	0	1	0	1	1	0	4600	64.6	26.5	2.43774	2.75	82	187	243	406.5	0.3	165	0	0	0	1	0	0	0	0	33
0	57	0	0	0	0		0	0	0	0	0	0	0	0	0	0	0	0	0	0	1	1	0	3730	78	14.2	5.49296	1.79	34	22	213	203	0.3	146	0	0	0	1	0	0	0	0	23.8
0	90	1	0	0	0		1	0	0	0	0	0	0	0	0	1	0	0	0	0	2	1	0	7260	72.3	20.7	3.49275	0.4	19	12	146	157.9	0.4	122	1	0	0	1	0	0	0	1	21.98
0	78	1	0	1	0	0	1	0	0	0	0	0	1	0	0	0	0	0	1	0	1	1	1	6960	83.5	8.9	9.38202	0.21	29	26	232	11.9	0.8	171	0	0	0	1	1	0	0	1	23.81
0	23	1	0	0	0		0	0	0	0	0	0	0	0	0	0	0	0	0	0	1	1		5280	45	25	1.8	1.04	28	54	143			191	0	0	0	0	0	0	0	0
0	44	0	0	0	0		0	0	0	0	0	0	0	0	0	0	0	0	0	0	0	0	0	3270	50.5	29.7	1.70034	0.05	81	89	300	11.8	1.6	322	0	0	0	1	0	0	0	0	31.1
0	56	1	0	0	0		0	0	0	0	0	0	0	0	0	0	0	0	0	0	0	0	0	4430	71.1	23.7	3	3.15	35	19	319	347.8	0.1	100	0	0	0	1	0	0	0	0	24.5
0	49	1	0	0	0		0	0	0	0	0	0	0	0	0	0	0	0	0	0	0	0	1	4770	64.6	25.2	2.56349	5.6	35	32	263	297.5	0.2	111	1	0	0	0	1	0	0	1	27.6
0	52	1	0	0	0		1	0	1	0	0	0	0	0	0	0	0	0	0	0	0	0	0	4720	75.5	12.9	5.85271	0.86	28	33	198	527.9	1	196	0	0	0	1	0	0	0	0
0	51	0	0	0	0		1	0	0	0	0	0	0	0	1	0	0	0	0	0	0	0	1	3170	46.7	36.9	1.26558	0.04	26	20	183	92.2	0.5	240	0	0	0	1	0	0	0	0	26.1
0	37	0	0	0	0		1	0	0	0	1	0	0	0	0	0	0	0	0	0	0	0	0	6170	75.2	18	4.17778	1.7	21	20	161	93.7	1.1	192	0	0	0	0	0	0	0	0	22.6
0	56	1	0	0	0		0	0	0	0	0	0	0	0	0	0	0	0	0	0	0	0	1	4410	60.6	24.7	2.45344	1.48	22	19	212	198.1	1.4	138	0	0	0	1	0	0	0	0	24.98
0	19	1	0	0	0		0	0	0	0	0	0	0	0	0	0	0	0	0	0	0	0	0	8150	60.4	29.9	2.02007	1.28	17	15	155	283.1	0	255	0	0	0	0	0	0	0	0	25.01
0	58	0	0	0	0		0	0	0	0	0	0	0	0	0	0	0	0	0	0	0	0	0	4700	73.2	21.1	3.46919	1.26	21	11	210	127.8	0.8	169	0	0	0	1	0	0	0	0	28.08
0	46	0	0	0	0		1	0	1	0	0	0	0	0	0	0	0	0	1	0	0	0	0	4780	52.9	34.1	1.55132	0.89	28	28	166	112.4	0	261	0	0	0	1	0	0	0	1	27
0	40	0	0	0	0		1	0	0	0	0	0	0	0	0	1	0	0	0	0	0	0	1	3220	47.5	39.8	1.19347	0.62	42	51	201	16.9	0.4	291	0	0	0	1	0	0	0	0	30.1
0	63	0	0	0	0		1	1	1	0	0	0	0	0	0	0	0	0	0	0	0	0	0	4200	75.1	9	8.34444	0.08	19	15	195	89.7	0.4	224	0	0	0	1	0	0	0	0	24.22
0	64	1	0	0	0		1	1	1	0	0	0	0	0	0	0	0	0	0	0	0	0	0	3790	80.5	14.8	5.43919	4.99	33	13	233	874.7	0.2	108	0	0	0	1	0	0	0	0	22.66
0	30	0	0	0	0		0	0	0	0	0	0	0	0	0	0	0	0	0	0	0	0	0	1760	37.5	51.7	0.725338	0.61	25	13	211	44.5	0.6	114	0	0	0	0	0	0	0	1	21.52
0	54	0	0	0	0		0	0	0	0	0	1	0	0	0	0	0	0	0	0	0	0	0	3390	63.4	28.6	2.21678	2.69	24	15	246	265.1	0.3	143	1	0	0	1	1	0	0	1	23.11
0	73	1	0	1	0	1	0		0	0	0	0	0	0	0	0	0	0	0	0	0	0	1	3820	75.5	18.3	4.12568	5.79	27	25	255	568.5	0.2	130	1	0	0	1	1	1	0	1	27.16
0	49	0	0	0	0		0	0	0	0	0	0	0	0	0	0	0	0	0	0	0	0	0	4220	66.4	25.1	2.64542	0.17	27	40	217	8.2	0.3	262	0	0	0	1	0	0	0	0	33.95
0	44	0	0	0	0		1	0	0	0	0	0	0	0	0	0	0	1	0	0	0	0	1	7030	51.8	41.8	1.23923	0.3	14	6	177	103.5	1.1	283	0	0	0	0	0	0	0	0	20.96
0	28	1	0	1	0	0	0	0	0	0	0	0	0	0	0	0	0	0	0	0	0	0	0	5480	86.7	8.9	9.74157	12.43	25	23	234	995	0.5	122	1	0	0	0	1	0	0	1	22.75
0	28	0	0	0	0		0	0	0	0	0	0	0	0	0	0	0	0	0	0	0	0	0	5310	76.4	18.1	4.22099	2.65	19	9	207		0.9	166	0	0	0	0	0	0	0	0	15
0	57	1	0	0	0		1	0	0	0	0	0	0	0	0	0	0	0	1	0	0	0	1	4550	64.2	23.1	2.77922	0.39	17	18	161	105.2	0.3	146	0	0	0	1	0	0	0	0	24.06
0	51	0	0	0	0		1	0	0	0	0	0	0	0	0	0	0	0	0	0	0	0	1	4150	81.8	12.5	6.544	1.23	28	14	341	54.5	0.3	140	1	0	0	0	1	0	0	1	17.16
0	42	0	0	0	0		1	0	0	0	0	0	0	0	1	0	0	0	1	0	0	0	1	5980	65.4	28.6	2.28671	1.83	27	28	231	279.8	0.4	197	0	0	0	1	0	0	0	0	33.38
0	50	1	0	0	0		1	0	0	0	0	0	0	0	0	0	0	1	0	0	0	0	1	5460	75.1	11.7	6.4188	1.58	30	36	214	316.3	0.9	133	0	0	0	1	0	0	0	1	30.03
0	45	1	0	0	0		1	0	1	0	0	0	0	0	0	0	0	0	1	0	0	0	1	6400	55.3	37.7	1.46684	0.05	19	24	166	174.4	0.3	236	0	0	0	0	0	0	0	0	30.46
0	36	1	0	0	0		1	0	0	0	1	0	0	0	0	0	0	0	0	0	0	0	0	5080	60.8	27.4	2.21898	1.84	35	36	191	449	1.1	215	0	0	0	0	0	0	0	0	22.57
0	21	1	0	0	0		0	0	0	0	0	0	0	0	0	0	0	0	0	0	0	0	0	5380	76.9	13	5.91538	2.56	61	116	305	443.1	0.8	128	0	0	0	1	0	0	0	1	35.6
0	49	1	0	0	0		1	0	1	0	0	0	0	0	0	0	0	0	0	0	0	0	1	5170	52.6	34.2	1.53801	1.66	72	151	201	539.4	0.3	146	0	0	0	1	0	0	0	0
0	49	0	0	0	0		1	0	0	0	0	0	0	0	0	1	0	0	0	0	0	0	0	2580	57.8	31	1.86452	0.26	31	19	207	139.1	0.2	160	1	0	0	0	0	0	0	0	17.53
0	44	1	0	0	0		1	0	0	0	0	0	0	0	0	0	0	0	1	0	0	0	1	3690	61.8	24.1	2.56432	0.02	25	19	176	455.3	0.7	94	0	0	0	1	0	0	0	1	22.96
0	57	1	0	0	0		1	0	0	0	0	0	0	0	0	0	0	0	1	0	0	0	1	5120	47.8	38.9	1.22879	0.11	23	22	195	129.7	0	143	0	0	0	1	0	0	0	1	21.63
0	34	0	0	0	0		1	0	0	0	1	0	0	0	0	0	0	0	0	0	0	0	1	6910	55.3	35.5	1.55775	0.06	51	68	257			241	0	0	0	0	0	0	0	0
0	44	1	0	0	0		0	0	0	0	0	0	0	0	0	0	0	0	0	0	0	0		6590	75.9	12.4	6.12097	0.67	36	74	196	371.4	0.2	196	0	0	0	0	0	0	0	0
0	20	0	0	0	0		0	0	0	0	0	0	0	0	0	0	0	0	0	0	0	0		6090	78.2	11.5	6.8	0.23	16	10	146			182	0	0	0	0	0	0	0	0
0	27	1	0	0	0		0	0	0	0	0	0	0	0	0	0	0	0	0	0	0	0		4860	78.2	8.6	9.09302	2.16	23	31	177	285.4		166	0	0	0	0	0	0	0	0
0	18	0	0	0	0		0	0	0	0	0	0	0	0	0	0	0	0	0	0	0	0	0	5690	85	9.3	9.13978	0.05	17	7	151	42.3	1.1	147	0	0	0	0	0	0	0	0
0	16	0	0	0	0		0	0	0	0	0	0	0	0	0	0	0	0	0	0	0	0	0	3500	72.3	15.4	4.69481	0.17	19	8	168			219	0	0	0	0	0	0	0	0
0	29	1	0	0	0		0	0	0	0	0	0	0	0	0	0	0	0	0	0	0	0	0	8050	73.5	15.4	4.77273	0.66	20	7	168			136	0	0	0	0	0	0	0	0
0	25	0	0	0	0		0	0	0	0	0	0	0	0	0	0	0	0	0	0	0	0	1	5960	76	13.9	5.46763	1.35	43	80	227	105	0.8	232	0	0	0	1	0	0	0	1	30
0	16	1	0	0	0		0	0	0	0	0	0	0	0	0	0	0	0	0	0	0	0	0	5120	52.7	15.5	3.4	0.05	24	14	162	99.3	0.3	155	0	0	0	0	0	0	0	1	16.77
0	53	0	0	0	0		0	0	0	0	0	0	0	0	0	0	0	0	0	0	0	0	0	3590	57.9	32	1.80937	0.1	49	71	232	146.5	0.1	156	1	0	0	0	1	0	0	1	22.71
0	92	1	0	0	0		1	0	1	0	0	0	0	0	0	0	0	0	1	0	0	0	0	5160	62.6	21.5	2.91163	0.73	21	16	184	289.7	2.5	144	0	0	0	0	0	0	0	1	22.15
0	46	1	0	0	0		0	0	0	0	0	0	0	0	0	0	0	0	0	0	0	0	0	8030	70	21	3.33333	2.94	29	34	163			170	1	0	0	0	0	0	0	1	28.55
0	26	0	0	0	0		0	0	0	0	0	0	0	0	0	0	0	0	0	0	0	0	0	3410	47.7	40.2	1.18657	0.02	14	8	162	18.5	0.1	186	0	0	0	0	0	0	0	1	19.27
0	31	1	0	0	0		0	0	0	0	0	0	0	0	0	0	0	0	0	0	0	0	0	3740	72.5	11.2	6.47321	0.17	19	21	159	106.5	0	148	0	0	0	0	0	0	0	0
0	32	0	0	0	0		0	0	0	0	0	0	0	0	0	0	0	0	0	0	0	0		2050	45.8	44.4	1.03153	0.04	18	10	188	5.8	0.2	73	0	0	0	0	0	0	0	1	20.92
0	48	0	0	0	0		0	0	0	0	0	0	0	0	0	0	0	0	0	0	0	0	0	3870	65.1	26.6	2.44737	0.14	27	22	197			201	0	0	0	0	0	0	0	0	29.94
0	37	1	0	0	0		0	0	0	0	0	0	0	0	0	0	0	0	0	0	0	0	0	4550	61.1	28.8	2.12153	1.6	37	69	194			221	0	0	0	0	0	0	0	0
0	40	1	0	0	0		1	0	0	0	0	0	0	0	0	0	0	0	0	1			0	10000	87.8	7.8	11.2564	1.83	43	54	189	73	1	204	0	0	0	1	0	0	0	0
